# Supplementary material for: Wearable, stable, highly sensitive hydrogel–graphene strain sensors
Source: publisher site journal article supplement (doi:10.3762/bjnano.10.47), 2019-02-14
Supplement: Additional file 1 [file 2190-4286-10-47-S1.pdf]

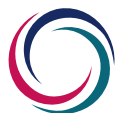

## Supporting Information

for

### **Wearable, stable, highly sensitive hydrogel–graphene strain sensors**

Jian Lv, Chuncai Kong, Chao Yang, Lu Yin, Itthipon Jeerapan, Fangzhao Pu, Xiaojing Zhang, Sen Yang and Zhimao Yang

*Beilstein J. Nanotechnol.* **2019**, *10*, 475–480. [doi:10.3762/bjnano.10.47](https://doi.org/10.3762/bjnano.10.47)

## Additional figures

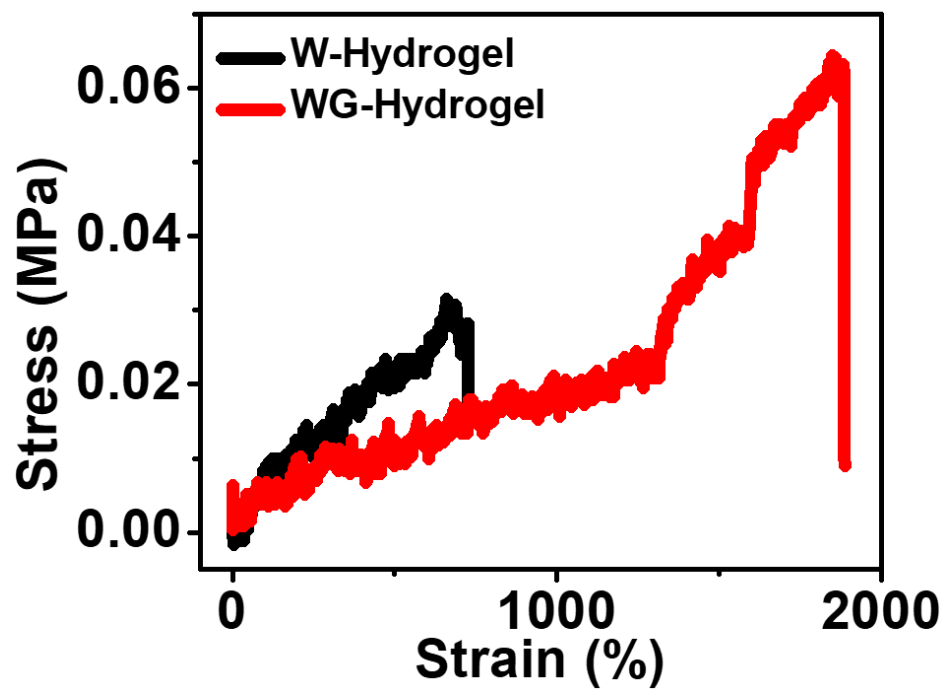

**Figure S1:** The yield strain-stress curves of the W-hydrogel and WG-hydrogel.

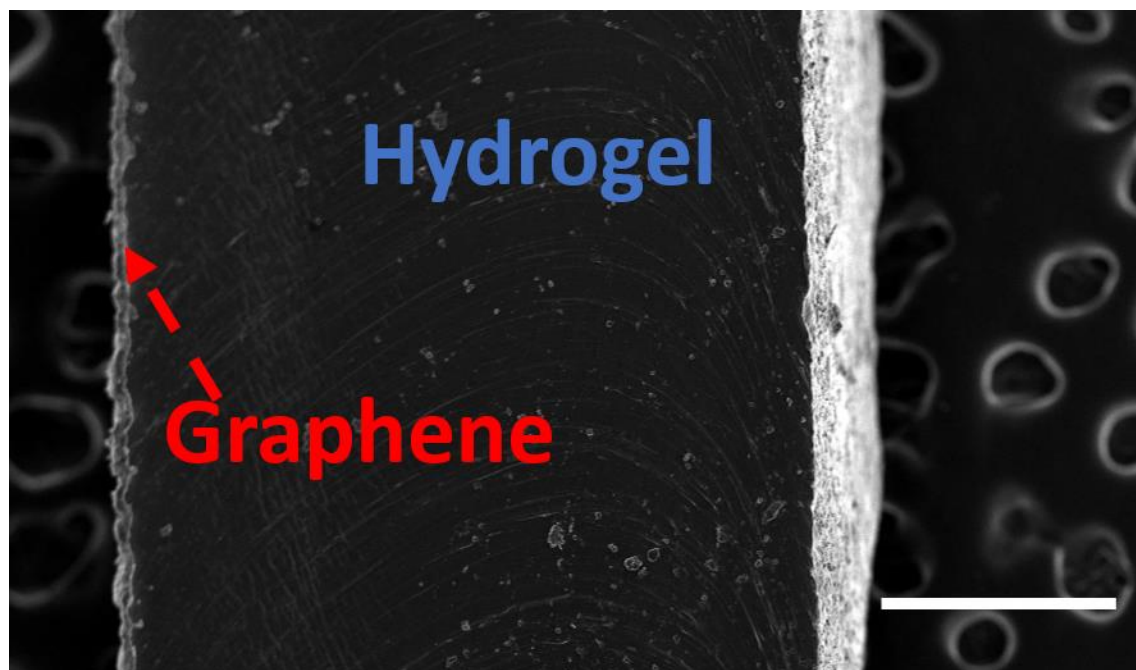

**Figure S2:** The cross-section SEM image of the graphene/hydrogel composite. Scale bar: 500  $\mu\text{m}$ .

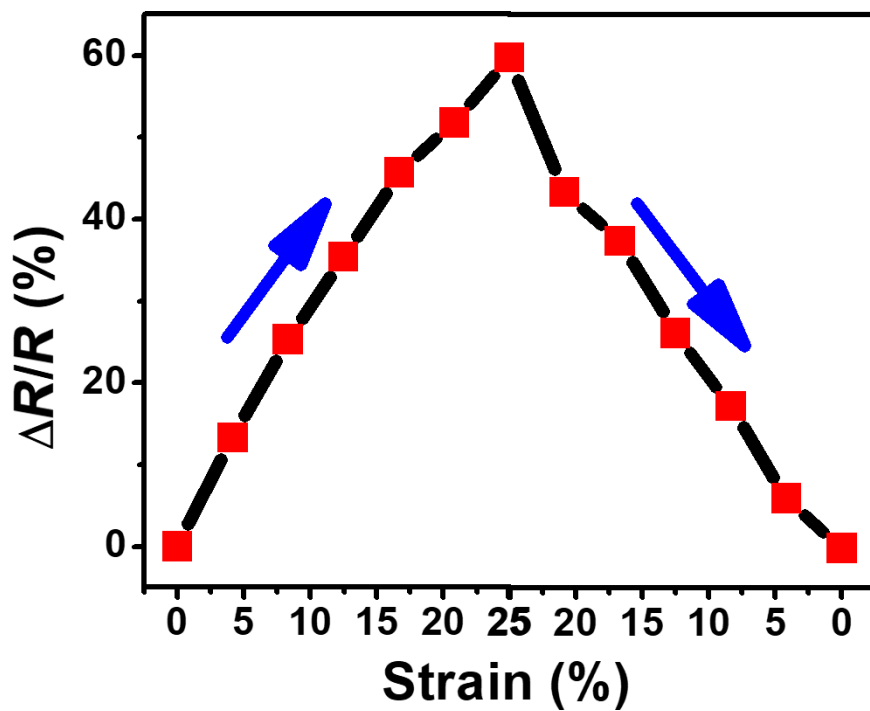

**Figure S3:** The hysteresis curve for graphene/WG-hydrogel strain sensor.

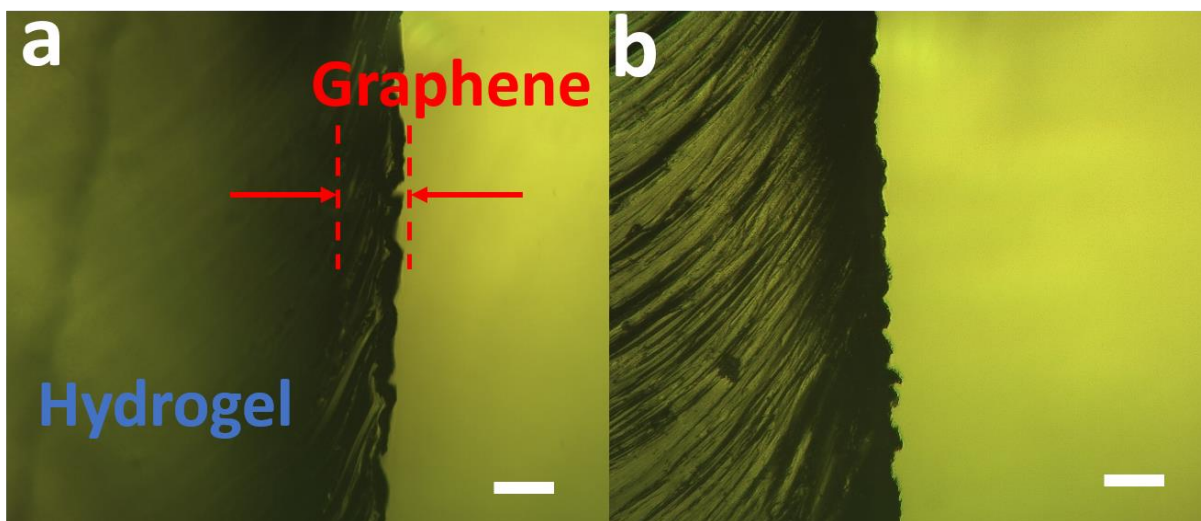

**Figure S4:** The optical cross-section images of the graphene/WG-hydrogel composite before (a) and after (b) 10 times of 25% stretching. Scar bar: 50  $\mu\text{m}$ .
